1 **Suitability of anthrax (*Bacillus anthracis*) in**  
2 **the Black Sea basin through the scope of**  
3 **distribution modelling**

4

5 Margarida Arede<sup>1\*</sup> , Alberto Allepuz<sup>1</sup> , Daniel Beltran-Alcrudo<sup>2</sup> , Jordi Casal<sup>1</sup> , Daniel  
6 Romero-Alvarez<sup>3,4\*</sup>

7 <sup>1</sup> Department of Animal Health and Anatomy, Veterinary Faculty, Universitat

8 Autònoma de Barcelona, Barcelona, Spain

9 <sup>2</sup> FAO, Regional Office for Europe and Central Asia, Budapest, Hungary

10 <sup>3</sup> Department of Ecology & Evolutionary Biology and Biodiversity Institute, University  
11 of Kansas, Kansas, USA

12 <sup>4</sup> Research Group of Emerging and Neglected Diseases, Ecoepidemiology and  
13 Biodiversity, Health Science Faculty, Universidad Internacional SEK (UISEK), Quito,  
14 Ecuador

15

16 \* Corresponding authors

17 E-mail: [margarida.decastro@uab.cat](mailto:margarida.decastro@uab.cat) (MA)

18 E-mail: [daromero88@gmail.com](mailto:daromero88@gmail.com) || [daniel.romero@uisek.edu.ec](mailto:daniel.romero@uisek.edu.ec) (DRA)

## 19 **Abstract**

20 The Black Sea basin has a strategic geographical location bridging Asia and Europe and  
21 depends on traditional livestock practices. Anthrax, a zoonotic bacterial disease caused  
22 by *Bacillus anthracis*, poses a significant global threat impacting public health, food  
23 security, pastoralist communities, and national economies. The disease is endemic or  
24 sporadic in the Black Sea basin, however, the study of its distribution has seldom been  
25 addressed, despite its burden and the presence of historical *B. anthracis* burial sites in the  
26 region. The viability of *B. anthracis* in a particular region is going to be influenced by  
27 multiple environmental factors, such as soil composition, climate, vegetation, and host  
28 abundance. To characterize the potential distribution of *B. anthracis* in the Black Sea  
29 basin, and therefore, the potential for anthrax outbreaks, we applied an ecological niche  
30 modelling framework using the Maxent algorithm, analyzing multiple variable  
31 combinations, and proposing a novel approach for interpreting in-risk anthrax areas. Our  
32 findings underscored the importance of host abundance to the anthrax dynamics in the  
33 region. We identified anthrax-suitable areas spanning central and eastern Türkiye,  
34 Armenia, southern Georgia, southern Russia, Bulgaria, southern and eastern Romania,  
35 Hungary, Moldova, and southern Ukraine, which align with findings from previous global  
36 and regional studies on the potential suitability of anthrax. The insights gained from our  
37 research might facilitate the development of targeted interventions and policies to  
38 mitigate the spread of this disease in pastoralist communities in the Black Sea basin.

## 39 Introduction

40 Anthrax, a zoonotic bacterial disease, is caused by *Bacillus anthracis*, a spore-forming,  
41 Gram-positive, and rod-shaped bacterium [1]. While wild and domestic ungulates are the  
42 primary hosts of *B. anthracis*, it can also affect other mammals, including humans [2,3].  
43 Ruminants are typically infected through environmental exposure by ingesting the  
44 pathogen's spores when grazing or browsing. In humans, the most common route of  
45 transmission occurs through occupational exposure to infected animal carcasses or animal  
46 products [1].

47 Anthrax is present in all continents, causing high yearly mortality in domestic livestock  
48 and wild animals, along with high morbidity in humans. As a result, this disease threatens  
49 worldwide public health, food security, the livelihoods of pastoralist communities, and  
50 national economies [1]. *B. anthracis* is endemic in areas of Sub-Saharan Africa, central  
51 and southwestern Asia, Central and South America, and limited regions within the United  
52 States (US). In Europe, the disease is sporadic in animals, with a higher prevalence in  
53 southern Europe, and linked to historical foci in northern areas [2]. Across the Black Sea  
54 basin, as of 2023, anthrax remained endemic in Türkiye, Azerbaijan, Georgia, and  
55 Moldova, and it was reported sporadically in Bulgaria, Romania, Ukraine, Belarus [4],  
56 and the Russian Federation [5]. Even in endemic countries, surveillance systems for  
57 anthrax are limited, contributing to underreporting and gaps in understanding its  
58 geographic extent [6]. More importantly, organic matter, calcium richness, and a neutral  
59 to alkaline pH, characteristic of black steppe soils found in central Europe, are favourable  
60 for the viability of *B. anthracis* spores in the environment [7,8]. As the environmental  
61 availability of spores is a hallmark of *B. anthracis* exposure to hosts, characterizing its  
62 ecological niche has been proposed as a way to understand its distribution [9]. The

63 concept of the ecological niche was first introduced by Grinnell [10] as a “limited range  
64 of ecological variables that could maintain a population without immigration” exclusive  
65 to a single species. This concept was later developed by Hutchinson [11] as a quantifiable  
66 ecological area that determines species fitness and survivorship [12]. By studying the *B.*  
67 *anthracis* ecological niche, we aim to describe the environmental patterns that support  
68 anthrax spores’ survival which eventually leads to hosts’ exposure in the Black Sea basin  
69 [7,13].

70 Traditional ecological niche modelling (ENM) relies on abiotic predictors (e.g., climate)  
71 to characterize a species distribution and considers biotic interactions (e.g., host  
72 dynamics) to have negligent effects in modelling, a hypothesis called the Eltonian noise  
73 effect [14]. However, there is growing evidence that its inclusion can be crucial to  
74 describe broad-scale species distributions, especially when modelling a disease system  
75 [15]. In this study, we explored ecological niche modelling approaches based on various  
76 combinations of predictor variables, incorporating only abiotic (climate, soil, and  
77 vegetation) or introducing a biotic predictor (ruminant abundance) to assess whether the  
78 inclusion of ruminant abundance improved model performance. Additionally, we  
79 proposed a novel approach to visualize and interpret Maxent algorithm outputs by  
80 leveraging uncertainty levels to further refine the output. This allows us to suggest high-  
81 risk areas of potential *B. anthracis* outbreaks in the Black Sea basin with higher accuracy,  
82 which can guide decision-makers to prioritize awareness campaigns, surveillance, and  
83 control activities.

## 84 **Methods**

85 This study explores the potential suitability of anthrax in the Black Sea basin through  
86 distribution modelling, using anthrax occurrences in domestic animals, from nine  
87 countries of the region, namely: Armenia, Azerbaijan, Belarus, Bulgaria, Georgia,  
88 Moldova, Romania, Türkiye, and Ukraine.

### 89 **Occurrence data and geoprocessing**

90 We curated a database of *B. anthracis* confirmed georeferenced occurrences causing  
91 disease in domestic animal species (i.e., cattle, sheep, goats, swine, and equine) that have  
92 been reported in the participating countries between 2006 and 2021 (hereafter anthrax  
93 occurrences). The data were procured internally by FAO, sourced directly by national  
94 experts, or available online. The consolidated database included international  
95 repositories, such as EMPRES-i and the World Animal Health Information System  
96 (WAHIS), regional sources, as the Animal Disease Information System (ADIS), and  
97 national databases from Moldova and Türkiye. Finally, it includes anthrax occurrences  
98 from Deka *et al.* [16] (S1 File and S1 File Table 1).

99 Anthrax occurrence locations were processed in R Statistical Software (v4.2.1) [17]. We  
100 started by removing duplicates based on location and excluding records with a level of  
101 precision of less than three decimal degrees of latitude or longitude. Finally, to avoid  
102 overfitting due to spatial autocorrelation and sampling bias [16,18], we applied a spatial  
103 thinning method of 30 km [19], using the R package *SpThin* [20]. The resulting thinned  
104 occurrences were used to develop ENMs, the final dataset comprised 226 occurrences  
105 (Fig 1).

106 **Fig 1: Anthrax georeferenced occurrences and calibration area (region M).** *Bacillus*  
107 *anthracis* confirmed georeferenced occurrences (in dark orange) considered for the  
108 calculation of parameter M (outlined in teal). Maps were developed using R Statistical  
109 Software (v4.2.1) [17].

110

## 111 **Calibration area**

112 The calibration region, or parameter M, is the area used to calibrate the model. The correct  
113 delimitation of M is critical as it may impact any step of an ENM, from its  
114 parameterization, validation, and model comparison [21], to the modelling outputs  
115 [22,23]. M should combine a spatial extent and environmental diversity that has been  
116 accessible to the studied species [24] during a time period that is relevant to the study  
117 [16,21]. Here, we defined M by a buffer surrounding the occurrences which distance was  
118 calculated as the mean of the distances from each occurrence to the geographic centroid  
119 [25] (Fig 1).

120

121

## 122 **Variable selection**

123 *B. anthracis* environmental and demographic predictors were identified based on  
124 previous literature studying anthrax spatial distribution [6,19,26]. We selected four  
125 environmental categories relating to climate (i.e., temperature and moisture), soil, and  
126 vegetation, plus one demographic variable. We included 15 bioclimatic variables for  
127 temperature and moisture extracted from the MERRAclim dataset [27] at a 5 arc-minute  
128 resolution for the period 2000 to 2010, which partially matched the timeframe of our  
129 occurrences. In this study, we excluded the variables describing interactions between

130 temperature and moisture—BIO8, BIO9, BIO18 and BIO19—due to known modelling  
131 artefacts [28]. MERRAclim is a high-resolution global repository of satellite-based  
132 bioclimatic variables, offering advantages over other commonly used climate data  
133 sources for ENM, specifically, MERRAclim shows less uncertainty in interpolated values  
134 when compared with WorldClim [27].

135 We selected four soil-related layers—pH, cation exchange capacity, carbon content, and  
136 nitrogen—extracted from the Global Soil Information Facilities, SoilGrids, database [29],  
137 available at <https://soilgrids.org/>, at a 0-5cm depth and 250m resolution. SoilGrids is a  
138 repository for chemical and physical soil properties, based on a global compilation of soil  
139 profile data sets and environmental layers. It is the result of contributions from various  
140 national and international agencies and is developed by the International Soil Reference  
141 and Information Centre (ISRIC)—World Soil Information [29,30].

142 As a measure of vegetation greenness, we used the Enhanced Vegetation Index (EVI)  
143 [31]. EVI's version 6.1 was obtained through the 16-day composite images from the  
144 MOD13Q1 product at 250 m resolution [31] captured by the Moderate Resolution  
145 Imaging Spectroradiometer (MODIS) sensor, located in NASA's TERRA satellite [32].  
146 We processed satellite images to obtain the median from a composite of satellite images  
147 from 2005 to 2021 via Google Earth Engine [33]. EVI offers advantages over the  
148 Normalized Difference Vegetation Index (NDVI) in correcting atmospheric conditions  
149 and background noise [31].

150 Finally, we included a demographic variable representing ruminant abundance, resulting  
151 from the sum of three raster layers for cattle, sheep, and goats abundance sourced from  
152 the Gridded Livestock World Distribution (GLW4) and adjusted to FAOSTAT 2015  
153 country totals at 1km resolution [34–37]. All variables were resampled to 1km resolution

154 using the *resample* function and bilinear method in R. Further details on anthrax  
155 environmental predictors and data sources are detailed in S1 File Table 2.

156 To reduce high dimensionality and variable autocorrelation, we used a principal  
157 component analysis (PCA) [9,38]. We used different sets of PCAs to determine three  
158 ENM approaches. For the first approach, we calculated principal components (PCs) for  
159 the entire set of 20 environmental variables. The two other approaches comprised PCs for  
160 each environmental domain (i.e., temperature, moisture, soil, and vegetation). The third  
161 approach treated environmental domains as in the second approach, also including the  
162 ruminant abundance variable. For each of these approaches, we used the PCs retaining at  
163 least 90% of the variation in the original data [39]. PCAs were developed using the  
164 *'kuenm\_rpca'* [40] function from *kuenm* package in R [40].

## 165 **Ecological Niche Modelling**

166 Maximum Entropy algorithm (MaxEnt version 3.4.4) [41] was implemented to define the  
167 ENMs. For this purpose, we applied the package *kuenm* [40]  
168 (<https://github.com/marlonecobos/kuenm>) in R Statistical Software (v4.2.1) [17] to  
169 calibrate MaxEnt ENMs and select optimal parameters for each of the three combinations  
170 of PCs as described earlier. We investigated different parameters, including combinations  
171 of MaxEnt feature classes (i.e., response types: linear, linear+quadratic,  
172 linear+quadratic+product), and five regularization multipliers (i.e., 0.1, 0.5, 1, 1.5, and  
173 2).

## 174 **Model evaluation**

175 We partitioned anthrax occurrences randomly: 70% of occurrences for model training  
176 (calibration), and 30% of occurrences for model testing (evaluation) [42,43]. Models were



177 primarily evaluated and selected via the *kuenm* package [40] following a three-step  
178 approach. First, models were assessed for statistical significance ( $p$ -value<0.05) based on  
179 the partial area under the curve of the Receiver Operating Characteristic ( $pROC$ ). Then,  
180 those models with a lower omission rate (OR, threshold=5%), [44], were selected. Lastly,  
181 the resulting models were further narrowed down using the Akaike information criterion  
182 corrected for sample size ( $AICc$ ) [45] to ensure low model complexity and good fit to the  
183 underlying data.

## 184 **Final Model**

185 Final models were generated with the function '*kuenm\_mod*' from *kuenm* [40]. For the  
186 three modelling approaches, we specified the output format as logistic, with a continuous  
187 scale from 0 (non-suitable) to 1 (suitable). Additionally, we used 50 bootstrap replicates  
188 to calculate the median and assess model uncertainty, i.e., the difference between the  
189 rasters with maximum and minimum values. Final model outputs were categorized (i.e.,  
190 suitable vs. non-suitable) considering the suitability value from the 95% of the calibration  
191 points (E=5%) as threshold for binarizing the model [46].

192 From the three modelling approaches, we selected the best model based on the following  
193 criteria: lowest OR, lowest number of parameters, larger predicted area, and lowest  
194 uncertainty. Finally, to interpret the final model, we overlapped the best binarized model  
195 (i.e., suitable/unsuitable) with the uncertainty raster and considered highly suitable areas  
196 to those with less than the third quartile of uncertainty values.

## 197 Results

198 A total of 1182 raw anthrax outbreak occurrences in domestic livestock, spanning from  
 199 2006 to 2021, were collated from various sources and used in the current study (S1 File.  
 200 Table 1). Cattle, sheep, and goats outbreaks accounted for 80.7%, 14%, and 4%  
 201 respectively, representing the majority of studied outbreaks (98.7%). The remaining  
 202 occurrences represented outbreaks attributed to horses and swine (1.3%). Over the  
 203 studied period, the cumulative frequency of anthrax occurrences started increasing in  
 204 July, peaked in September (n=193) at three times the mean for the first six months of the  
 205 year (n=65), and gradually decreased until December (n=62, S2 Fig).

206 Each of the three explored approaches resulted in 15 candidate models, reflecting  
 207 combinations of three feature classes and five regularization multiplier values. The three  
 208 best-fitting models were identified through the described three-step framework (Table 1).

209

### 210 **Table 1. Parameters of ecological niche models categorized by principal component** 211 **analysis (PCA) approach.**

212 The best model for each approach was selected using a three-step selection framework  
 213 (i.e., pROC, omission rates, and AICc). AICc: Akaike information criterion corrected for  
 214 sample; dem variable: demographic variable; Features: L=linear, LQ=linear+quadratic,  
 215 LQP=linear+quadratic+product; PCA: principal component analysis; pROC: partial area  
 216 under the Receiver Operating Characteristic; OR: omission rate; RM: regularization  
 217 multiplier.

| Approach                                          | Selected features | Selected RM | No. Predicted pixels | pROC significance | OR-5%  | AICc     | No. of parameters |
|---------------------------------------------------|-------------------|-------------|----------------------|-------------------|--------|----------|-------------------|
| <b>Approach 1:</b><br>All variables<br>PCA        | LQP               | 0.1         | 34,917               | <0.05             | 0.0294 | 4,732.26 | 20                |
| <b>Approach 2:</b><br>PCA by domain<br>(env only) | LQP               | 0.5         | 25,895               | <0.05             | 0.0441 | 4,634.63 | 41                |

|                                                           |    |     |        |       |        |          |    |
|-----------------------------------------------------------|----|-----|--------|-------|--------|----------|----|
| <b>Approach 3:</b><br>PCA by<br>domain + dem.<br>variable | LQ | 0.5 | 34,323 | <0.05 | 0.0147 | 4,715.51 | 18 |
|-----------------------------------------------------------|----|-----|--------|-------|--------|----------|----|

218

219 The model output for *B. anthracis* developed using a PCA per environmental domain plus  
220 the variable representing ruminant abundance in the studied area were selected as the best  
221 overall model (i.e., approach 3; Table 1). This model yielded a wider prediction with  
222 lower uncertainty and presented a lower OR with a lower number of parameters than the  
223 two other approaches (Table 1). To generate this ENM approach, we retained the first  
224 three PCs for temperature and soil, explaining 98.83% and 95.77% of their respective  
225 domains, the first two PCs explaining 99.44% of the moisture domain, and one PC each  
226 for EVI and ruminant abundance. Models' median, uncertainty, and areas suitable and  
227 non-suitable for *B. anthracis* at 5% threshold are illustrated in Fig 2. Outputs for the other  
228 two approaches can be found in the S2 File Fig 1. We highlight that the temperature and  
229 soil domains had the highest contribution to the final selected model accounting for 38.2  
230 and 32.9%, whereas similar contributions were attributed to EVI and ruminant  
231 abundance, at 10.3% and 9.9%, respectively (S2 File Table1).

232

233

234

235 **Fig 2: Ecological niche model outputs for *Bacillus anthracis* in the Black Sea basin.**

236 Model outputs for the selected best model for *B. anthracis* using principal components  
237 (PCs) by domain plus the demographic variable based on ruminant abundance (i.e.,  
238 approach 3; Table 1). Maps depict (A) continuous suitability, (B) uncertainty, and (C) a  
239 binary map of suitability using a 5% threshold. Maps were developed using R Statistical  
240 Software (v4.2.1) [17].

241

242 We contrasted suitable areas for anthrax in the overall best model binary map with  
243 varying levels of model uncertainty. Low uncertainty was defined here as those pixels  
244 with values below the third quartile of the uncertainty range (i.e.,  $Q3 = 0.23$ ; Fig 3A).  
245 Regions identified as highly suitable with low uncertainty (Fig 3B) span western to central  
246 Armenia, extending into the southwest of Azerbaijan; they include a limited area in the  
247 northeast of Azerbaijan and the southern border region of the Russian Federation; the  
248 interior regions of the Islamic Republic of Iran and southern Russian Federation; as well  
249 as the interior eastern, central and central-south areas of Türkiye (Fig 3B). Additionally,  
250 anthrax suitability is also observed in centre south and north Bulgaria and south and east  
251 Romania, centre east of North Macedonia, north of Serbia, southeast of Hungary, centre  
252 to south of Moldova, and the south coast of Ukraine with the Black Sea (Fig 3B).

253 Regions with high suitability with low uncertainty where no anthrax occurrences have  
254 been reported (Fig 1 and Fig 3B) can be found in the southern interior of the Russian  
255 Federation, the interior of the Islamic Republic of Iran, the central southern region of  
256 Bulgaria, central-east of North Macedonia, northern Serbia and centre to east of Hungary.  
257 Conversely, regions where anthrax cases have been reported, yet are depicted in our  
258 models as areas of low anthrax suitability, are primarily seen in central to northern regions  
259 of Ukraine and southern regions of Belarus. High suitability areas with high uncertainty  
260 are observed along the coast of southern Türkiye with the Black Sea, the west coastal area  
261 of Türkiye with the Mediterranean Sea, and the southern-east region of Türkiye along the  
262 border of the Republic of Iraq and the Islamic Republic of Iran.

263

264 **Fig 3. Suitability versus uncertainty regions for the best-selected model of the**  
265 **potential distribution of *Bacillus anthracis*.**

266 (A) Illustrates the correlation between continuous anthrax suitability and uncertainty for  
267 the best model (Table 1, Fig 2). High uncertainty was defined by a cut-off set as the third  
268 quartile across all uncertainty values ( $\geq 0.23$ ). (B) Depicts the 5% binary output of  
269 anthrax suitability with higher (orange) and lower (ochre) uncertainty. Graph and map  
270 were developed using R Statistical Software (v4.2.1) [16].

271

## 272 **Discussion**

273 Through the scope of distribution modelling, we found highly suitable regions for *B.*  
274 *anthracis* survival in the Black Sea basin; these areas might well benefit from investment  
275 and resource allocation for the control and prevention of anthrax outbreaks. Our model's  
276 predictions agreed with findings from previous studies conducted at various geographical  
277 scales. Suitable areas identified for anthrax spanned from central to eastern Türkiye,  
278 Armenia, southern Georgia, the southern Russian Federation, Bulgaria, southern and  
279 eastern Romania, Hungary, Moldova, and southern Ukraine. These areas are similar to  
280 those found by recent studies exploring the ecological niche of *B. anthracis* at a global  
281 scale [6,16], as well as a study specifically focused on northern latitudes [47].  
282 Additionally, our model found anthrax-suitable areas with low uncertainty in northeast  
283 Azerbaijan, consistent with anthrax spatial clusters observed between 2000 and 2010  
284 [48]; and the Odesa region in Ukraine, converging with a publication reporting *B.*  
285 *anthracis* in environmental samples and animal anthrax cases in this area [49]. Finally,  
286 we should highlight that although our model did not include anthrax occurrences from  
287 Georgia, it accurately predicted the southeastern region of this country as suitable for  
288 anthrax, corroborating previous reports (Pers. Comm. T. Chaligava). However, it was  
289 unable to predict similar suitability in central to northern regions of Georgia, where both  
290 livestock (Pers. Comm. T. Chaligava) and human anthrax cases [50] have been  
291 documented.

292 There is a well-established spatio-temporal link between human and livestock anthrax  
293 cases due to the high occupational nature of anthrax in humans [1]. In this regard, our  
294 model corroborates the high incidence of human and livestock anthrax cases found in  
295 eastern provinces of Türkiye, clustering around animal trade centres and large  
296 international commercial roads [51,52] and linked with livestock trade routes between  
297 eastern and western Türkiye and from the centre Anatolia to the southern and northern  
298 parts of the country [52].

299 Upon comparing Maxent ENMs assessing various variable combinations, we found that  
300 the inclusion of the ruminant abundance (biotic variable)—which PC ranked fourth in the  
301 final model (S2 File Table 1)—improved model performance and was an important  
302 parameter in selecting the best overall model of anthrax suitability in this region.  
303 Livestock’s abundance has previously been explored and seen as influential in anthrax  
304 distribution studies [26,47,53–56]. These results emphasize the importance of biotic  
305 interactions for disease systems [15]; ruminants are the most susceptible hosts to *B.*  
306 *anthracis* and play a key role in the maintenance and transmission of anthrax [57]. It is  
307 worth noting that ruminant production is a critical livestock subsector in the majority of  
308 the studied countries [58–67]. In addition, areas found as suitable for anthrax by our  
309 model largely match rural settings where pastoralism is widely practiced [68], and  
310 livestock is the main source of subsistence for these populations [4,68]. Similarly, Carlson  
311 *et al* [6] suggested higher human anthrax risk in rural areas, and observed increased  
312 human and livestock anthrax vulnerability in rainfed systems across arid and temperate  
313 landscapes in the same region (Eurasia).

314 Soils and temperature had the highest contribution percentage to our model (S2 File Table  
315 1). Chernozem or black steppe-type soils, prevalent in eastern Europe [69] and partly  
316 covering our M region, are known to create favourable conditions for anthrax sporulation

317 [70] and have been associated with anthrax epidemics [7]. At the same time, the southern  
318 part of the M region, where the mean annual temperature is higher, was identified as  
319 suitable for anthrax by our model. This result aligns with established knowledge  
320 regarding favourable conditions for anthrax viability in areas with temperatures  
321 exceeding 15 °C [3] and is further supported by results from Carlson *et al.* and Walsh *et*  
322 *al.* [6,47]. Furthermore, cumulative anthrax occurrences were higher between July and  
323 October. This period corresponds to high temperatures and dry conditions across the  
324 region [71], which facilitate the mechanical dispersion of anthrax spores [8].  
325 Additionally, this period coincides with the time when ruminants graze in local pastures  
326 or migrate to summer pastures. As the grass gradually becomes shorter during this season,  
327 ruminants tend to graze closer to the soil, heightening their risk of exposure to the *B.*  
328 *anthracis* spores [72]. Moreover, the high temperatures during this time may also lead to  
329 ruminants' nutritional stress and compromise their immunocompetence, making them  
330 more susceptible to the disease [73]. Such temporal pattern was previously observed in  
331 Azerbaijan [74], Türkiye [75] and Kyrgyzstan [72].

332 Some of the few anthrax occurrences in the northern M region were missed by our final  
333 model (Fig 3). This discrepancy may be attributed to the low mean annual temperature at  
334 these latitudes, which theoretically hinders anthrax viability [3]. However, it is worth  
335 noting that during summer months, temperatures may still enable significant sporulation  
336 of *B. anthracis* [3]. In contrast, Deka *et al.* [16] showed “very high” and “high” suitability  
337 for anthrax in parts of our northern region M, diverging from our findings. Additionally,  
338 anthrax cases in Ukraine and Belarus were reported sparingly, likely due to rigorous  
339 documentation of biothermal pits and infected burial grounds [49]. These areas are subject  
340 to strict legislation prohibiting any construction as well as agricultural and pastoral  
341 practices without prior disinfection at these sites. Furthermore, the lack of cases in these

342 countries may be also explained by the prevalence of intensive livestock production  
343 systems where ruminants are often confined, and pastoral practices are uncommon,  
344 reducing opportunities for exposure to anthrax spores. Nevertheless, despite the current  
345 suboptimal environmental conditions for anthrax viability in this region, climate change-  
346 led extreme weather events, such as warmer temperatures, high precipitation and droughts  
347 [76] are expected to increase anthrax risk in these areas [16,47].

348 Besides local climate, soil characteristics, host demography, and wildlife interactions,  
349 anthrax outbreaks are associated with a range of socio-economic factors. These factors  
350 encompass food security, disease awareness, cultural and religious events, as well as  
351 access to veterinary services and healthcare. These factors are directly linked with  
352 livestock production practices, including production systems, pastoralism, seasonal  
353 movements, veterinary surveillance and control capacity, vaccination use and coverage,  
354 and the application of biosecurity measures [77]. Further research into the impact of these  
355 factors on the risk of anthrax outbreaks among livestock and humans in the region would  
356 complement the findings of the current study.

357 Our regional-scale map illustrating anthrax suitability complements existing studies  
358 targeting this region at broader scales [6,16,47,56]. In our study, we explicitly  
359 incorporated uncertainty measures into our final predictions, aiming to highlight and  
360 define more accurately potential anthrax-suitable. The inclusion of uncertainty in the final  
361 outputs of ENMs is seldom implemented [6,16,19,26], and we advocate for its  
362 consideration, especially in ENM studies exploring pathogens.

363 As an evidence-based map of anthrax distribution, the areas highlighted by our model  
364 should guide future research efforts aimed at anticipating future outbreaks. They should  
365 facilitate resource allocation to improve the cost-efficiency of surveillance and control



366 activities, as well as disease awareness and educational campaigns promoting appropriate  
367 quarantine, carcass handling, and disposal. For the success of such preventative measures,  
368 we stress the importance of coordinated efforts between the veterinary and public health  
369 sectors at both national and international levels.

## 370 **Conclusions**

371 Our study identified high-risk areas for anthrax across central and eastern Türkiye,  
372 Armenia, southern Georgia, southern Russia, Bulgaria, southern and eastern Romania,  
373 Hungary, Moldova, and southern Ukraine. These findings are critical for prioritizing  
374 resource allocation and implementing anthrax management interventions in the region.

375 Leveraging uncertainty levels and explicitly including them in our modelling approach  
376 improved the reliability of the potential suitable and non-suitable regions for anthrax  
377 identified in our final maps. We believe this approach also facilitates the interpretability  
378 of our results and enhances their utility for decision-makers and stakeholders.

379 The inclusion of ruminant abundance as a biotic variable in our modelling framework  
380 significantly improved model performance, highlighting the importance of host-pathogen  
381 interactions in the study region.

382 Overall, anthrax poses a significant threat to livestock, particularly ruminants, whose  
383 production sector is essential for the economies and subsistence of rural populations in  
384 the Black Sea region. We anticipate that the risk maps generated in this work offer  
385 comprehensive insights into anthrax distribution in this region, providing valuable  
386 guidance for targeted interventions to mitigate the impacts of this disease.

387

## 388 **Acknowledgements**

389 The authors are thankful to the relevant national authorities from the participating  
390 countries for sharing their data to carry out the project. We acknowledge Giuseppina  
391 Cinardi from FAO-NSAL for her contribution to generating GLW 4 maps for ruminant  
392 distribution. We would also like to acknowledge the United States DoD DTRA  
393 Cooperative Threat Reduction Program’s support of project HDTRA1-19-1-0037  
394 “Global Framework for the Progressive Control of Transboundary Animal Diseases (GF-  
395 TADs)”.

## 396 References

- 397 1. WHO, WOA, FAO. Anthrax in humans and animals. Fourth edition. World Health  
398 Organization; 2008.
- 399 2. Beyer W, Turnbull PCB. Anthrax in animals. *Mol Aspects Med.* 2009;30: 481–489.  
400 doi:10.1016/j.mam.2009.08.004.
- 401 3. Hugh-Jones ME, de Vos V. Anthrax and wildlife. *Rev Sci Tech Int Off Epizoot.*  
402 2002;21: 359–383. doi:10.20506/rst.21.2.1336.
- 403 4. Arede M, Beltran Alcrudo D, Aliyev J, Chaligava T, Keskin I, Markosyan T, *et al.*  
404 Examination of critical factors influencing ruminant disease dynamics in the Black  
405 Sea Basin. *Front Vet Med.* 2023;10. doi:10.3389/fvets.2023.1174560.
- 406 5. Simonova EG, Kartavyaya SA, Raichich SR, Loktionova MN, Shabeykin AA.  
407 Anthrax in the Russian Federation: improvement of epizootic-epidemiological  
408 surveillance at the present stage. *Epidemiol Vaccinal Prev.* 2018;17: 57–62.  
409 doi:10.31631/2073-3046-2018-17-2-57-62.
- 410 6. Carlson CJ, Kracalik IT, Ross N, Alexander KA, Hugh-Jones ME, Fegan M, *et al.*  
411 The global distribution of *Bacillus anthracis* and associated anthrax risk to humans,  
412 livestock and wildlife. *Nat Microbiol.* 2019;4: 1337–1343. doi:10.1038/s41564-  
413 019-0435-4.
- 414 7. Hugh-Jones M, Blackburn J. The ecology of *Bacillus anthracis*. *Mol Aspects Med.*  
415 2009;30: 356–367. doi:10.1016/j.mam.2009.08.003.
- 416 8. Van Ness GB. Ecology of anthrax: anthrax undergoes a propagation phase in soil  
417 before it infects livestock. *Science.* 1971;172: 1303–1307. doi:  
418 10.1126/science.172.3990.130.
- 419 9. Townsend P. Mapping disease transmission risk: enriching models using  
420 biogeography and ecology. Townsend J, editor. JHU Press; 2014.
- 421 10. Grinnell J. The niche-relationships of the California thrasher. *The Auk.* 1917;34:  
422 427–433. doi:10.2307/4072271.
- 423 11. Strong DR. Reviewed work: an introduction to population ecology by G. E.  
424 Hutchinson. *J Biogeogr.* 1979;6: 201–204. doi:10.2307/3038052.
- 425 12. Colwell RK, Rangel TF. Hutchinson’s duality: the once and future niche. *Proc Natl*  
426 *Acad Sci.* 2009;106: 19651–19658. doi:10.1073/pnas.0901650106.
- 427 13. Blackburn JK. Integrating geographic information systems and ecological niche  
428 modeling into disease ecology: a case study of *Bacillus anthracis* in the United  
429 States and Mexico. In: O’Connell KP, Skowronski EW, Sulakvelidze A, Bakanidze  
430 L, editors. *Emerging and Endemic Pathogens.* Dordrecht: Springer Netherlands;  
431 2010. pp. 59–88. doi:10.1007/978-90-481-9637-1\_7.

- 432 14. de Araújo CB, Marcondes-Machado LO, Costa GC. The importance of biotic  
433 interactions in species distribution models: a test of the Eltonian noise hypothesis  
434 using parrots. *J Biogeogr.* 2014;41: 513–523. doi:10.1111/jbi.12234.
- 435 15. Escobar LE. Ecological niche modeling: an introduction for veterinarians and  
436 epidemiologists. *Front Vet Sci.* 2020;7: 519059.  
437 doi:10.3389/FVETS.2020.519059/BIBTEX.
- 438 16. Deka MA, Vieira AR, Bower WA. Modelling the ecological niche of naturally  
439 occurring anthrax at global and circumpolar extents using an ensemble modelling  
440 framework. *Transbound Emerg Dis.* 2022. 69(5):e2563-e2577.  
441 doi:10.1111/TBED.14602.
- 442 17. R Core Team. R: A language and environment for statistical computing. Vienna,  
443 Austria. R Foundation for Statistical Computing; 2023. Available from:  
444 <https://www.r-project.org/>
- 445 18. Veloz SD. Spatially autocorrelated sampling falsely inflates measures of accuracy  
446 for presence-only niche models. *J Biogeogr.* 2009;36: 2290–2299.  
447 doi:10.1111/J.1365-2699.2009.02174.X.
- 448 19. Romero-Alvarez D, Peterson AT, Salzer JS, Pittiglio C, Shadomy S, Traxler R, *et*  
449 *al.* Potential distributions of *Bacillus anthracis* and *Bacillus cereus* biovar *anthracis*  
450 causing anthrax in Africa. *PLoS Negl Trop Dis.* 2020;14: e0008131.  
451 doi:10.1371/JOURNAL.PNTD.0008131.
- 452 20. Aiello-Lammens ME, Boria RA, Radosavljevic A, Vilela B, Anderson RP. spThin:  
453 an R package for spatial thinning of species occurrence records for use in ecological  
454 niche models. *Ecography.* 2015;38: 541–545. doi:10.1111/ECOG.01132.
- 455 21. Barve N, Barve V, Jiménez-Valverde A, Lira-Noriega A, Maher SP, Peterson AT,  
456 *et al.* The crucial role of the accessible area in ecological niche modeling and species  
457 distribution modeling. *Ecol Model.* 2011;222: 1810–1819.  
458 doi:10.1016/J.ECOLMODEL.2011.02.011.
- 459 22. Anderson RP, Raza A. The effect of the extent of the study region on GIS models  
460 of species geographic distributions and estimates of niche evolution: preliminary  
461 tests with montane rodents (genus *Nephelomys*) in Venezuela. *J Biogeogr.* 2010;37:  
462 1378–1393. doi:10.1111/J.1365-2699.2010.02290.X.
- 463 23. Machado-Stredel F, Cobos ME, Peterson AT. A simulation-based method for  
464 selecting calibration areas for ecological niche models and species distribution  
465 models. *Front Biogeogr.* 2021;13. doi:10.21425/F5FBG48814.
- 466 24. Soberon J, Peterson AT. Interpretation of models of fundamental ecological niches  
467 and species' distributional areas. *Biodivers Inform.* 2005;2: 1–10.  
468 doi:10.17161/BI.V2I0.4.
- 469 25. Poo-Muñoz DA, Escobar LE, Peterson AT, Astorga F, Organ JF, Medina-Vogel G.  
470 *Galictis cuja* (Mammalia): an update of current knowledge and geographic

- 471 distribution. *Iheringia Sér Zool.* 2014;104: 341. doi:10.1590/1678-  
472 476620141043341346.
- 473 26. Pittiglio C, Shadomy S, El Idrissi A, Soumare B, Lubroth J, Makonnen Y.  
474 Seasonality and ecological suitability modelling for anthrax (*Bacillus anthracis*) in  
475 Western Africa. *Animals.* 2022;12: 1146. doi:10.3390/ANI12091146/S1.
- 476 27. Vega GC, Pertierra LR, Olalla-Tárraga MÁ. MERRAclim, a high-resolution global  
477 dataset of remotely sensed bioclimatic variables for ecological modelling. *Sci Data*  
478 2017 41. 2017;4: 1–12. doi:10.1038/sdata.2017.78.
- 479 28. Booth TH. Checking bioclimatic variables that combine temperature and  
480 precipitation data before their use in species distribution models. *Austral Ecol.*  
481 2022;47: 1506–1514. doi:10.1111/aec.13234.
- 482 29. Hengl T, De Jesus JM, Heuvelink GBM, Gonzalez MR, Kilibarda M, Blagotić A, *et*  
483 *al.* SoilGrids250m: Global gridded soil information based on machine learning.  
484 *PLoS ONE.* 2017;12: e0169748. doi:10.1371/JOURNAL.PONE.0169748.
- 485 30. Poggio L, de Sousa LM, Batjes NH, Heuvelink GBM, Kempen B, Ribeiro E, *et al.*  
486 SoilGrids 2.0: producing soil information for the globe with quantified spatial  
487 uncertainty. *SOIL.* 2021;7: 217–240. doi:10.5194/soil-7-217-2021.
- 488 31. Didan K. MODIS/Terra Vegetation Indices 16-Day L3 Global 250m SIN Grid  
489 V061. NASA EOSDIS Land Processes Distributed Active Archive Center; 2021.  
490 doi:10.5067/MODIS/MOD13Q1.061.
- 491 32. Wardlow BD, Egbert SL. A comparison of MODIS 250-m EVI and NDVI data for  
492 crop mapping: a case study for southwest Kansas. [https://doi-](https://doi.org/10.1080/01431160902897858)  
493 [Orgareuabcat10108001431160902897858.](https://doi.org/10.1080/01431160902897858) 2010;31: 805–830.  
494 doi:10.1080/01431160902897858.
- 495 33. Gorelick N, Hancher M, Dixon M, Ilyushchenko S, Thau D, Moore R. Google Earth  
496 Engine: Planetary-scale geospatial analysis for everyone. *Remote Sens Environ.*  
497 2017;202: 18–27. doi:10.1016/j.rse.2017.06.031.
- 498 34. Gilbert M, Nicolas G, Cinardi G, Van Boeckel TP, Vanwambeke SO, Wint GRW,  
499 *et al.* Global distribution data for cattle, buffaloes, horses, sheep, goats, pigs,  
500 chickens and ducks in 2010. *Sci Data* 2018 51. 2018;5: 1–11.  
501 doi:10.1038/sdata.2018.227.
- 502 35. Gilbert M, Cinardi G, Da Re D, Wint WGR, Wisser D, Robinson TP. Global cattle  
503 distribution in 2015 (5 minutes of arc). *Harv Dataverse.* 2022.  
504 doi:10.7910/DVN/LHBICE.
- 505 36. Gilbert M, Cinardi G, Da Re D, Wint WGR, Wisser D, Robinson TP. Global goats  
506 distribution in 2015 (5 minutes of arc). *Harv Dataverse.* 2022.  
507 doi:10.7910/DVN/YYG6ET.

- 508 37. Gilbert M, Cinardi G, Da Re D, Wint WGR, Wisser D, Robinson TP. Global sheep  
509 distribution in 2015 (5 minutes of arc). Harv Dataverse. 2022.  
510 doi:10.7910/DVN/VZOYHM.
- 511 38. Pearson K. LIII. On lines and planes of closest fit to systems of points in space.  
512 Lond Edinb Dublin Philos Mag J Sci. 1901;2: 559–572. doi:  
513 10.1080/14786440109462720.
- 514 39. Cruz-Cárdenas G, López-Mata L, Villaseñor JL, Ortiz E. Potential species  
515 distribution modeling and the use of principal component analysis as predictor  
516 variables. Rev Mex Biodivers. 2014;85: 189–199. doi:10.7550/rmb.36723.
- 517 40. Cobos ME, Townsend Peterson A, Barve N, Osorio-Olvera L. Kuenm: An R  
518 package for detailed development of ecological niche models using Maxent. PeerJ.  
519 2019;2019: e6281. doi:10.7717/PEERJ.6281/SUPP-2.
- 520 41. Phillips SJ, Anderson RP, Schapire RE. Maximum entropy modeling of species  
521 geographic distributions. Ecol Model. 2006;190: 231–259.  
522 doi:https://doi.org/10.1016/j.ecolmodel.2005.03.026.
- 523 42. Roberts DR, Bahn V, Ciuti S, Boyce MS, Elith J, Guillera-Aroita G, *et al.* Cross-  
524 validation strategies for data with temporal, spatial, hierarchical, or phylogenetic  
525 structure. Ecography. 2017;40: 913–929. doi:10.1111/ecog.02881.
- 526 43. Muscarella R, Galante PJ, Soley-Guardia M, Boria RA, Kass JM, Uriarte M, *et al.*  
527 ENMeval: An R package for conducting spatially independent evaluations and  
528 estimating optimal model complexity for Maxent ecological niche models. Methods  
529 Ecol Evol. 2014;5: 1198–1205. doi:10.1111/2041-210X.12261.
- 530 44. Anderson RP, Lew D, Peterson AT. Evaluating predictive models of species'  
531 distributions: criteria for selecting optimal models. Ecol Model. 2003;162: 211–232.  
532 doi:10.1016/S0304-3800(02)00349-6.
- 533 45. Velasco JA, González-Salazar C. Akaike information criterion should not be a “test”  
534 of geographical prediction accuracy in ecological niche modelling. Ecol Inform.  
535 2019;51: 25–32. doi:https://doi.org/10.1016/j.ecoinf.2019.02.005.
- 536 46. Peterson AT, Papeş M, Soberón J. Rethinking receiver operating characteristic  
537 analysis applications in ecological niche modeling. Ecol Model. 2008;213: 63–72.  
538 doi:10.1016/j.ecolmodel.2007.11.008.
- 539 47. Walsh MG, de Smalen AW, Mor SM. Climatic influence on anthrax suitability in  
540 warming northern latitudes. Sci Rep. 2018;8: 9269. doi:10.1038/s41598-018-27604-  
541 w.
- 542 48. Kracalik I, Abdullayev R, Asadov K, Ismayilova R, Baghirova M, Ustun N, *et al.*  
543 Changing patterns of human anthrax in Azerbaijan during the post-soviet and  
544 preemptive livestock vaccination eras. PLoS Negl Trop Dis. 2014;8: 2985.  
545 doi:10.1371/journal.pntd.0002985.

- 546 49. Kozytska T, Bassiouny M, Chechet O, Ordynska D, Galante D, Neubauer H, *et al.*  
547 Retrospective analysis of official data on anthrax in Europe with a special reference  
548 to Ukraine. *Microorganisms*. 2023;11.  
549 doi:10.3390/MICROORGANISMS11051294.
- 550 50. Kracalik IT, Malania L, Tsertsvadze N, Manvelyan J, Bakanidze L, Imnadze P, *et*  
551 *al.* Evidence of local persistence of human anthrax in the country of Georgia  
552 associated with environmental and anthropogenic factors. *PLoS Negl Trop Dis*.  
553 2013;7. doi:10.1371/journal.pntd.0002388.
- 554 51. Topluoglu S, Aktas D, Celebi B, Kara F, Doganay M, Alp E. Human anthrax in  
555 Turkey: A ten years' experience (2009–2018). *Trop Doct*. 2020;51.  
556 doi:10.1177/0049475520969542.
- 557 52. Ortatatli M, Karagoz A, Percin D, Kenar L, Kilic S, Durmaz R. Antimicrobial  
558 susceptibility and molecular subtyping of 55 Turkish *Bacillus anthracis* strains  
559 using 25-loci multiple-locus VNTR analysis. *Comp Immunol Microbiol Infect Dis*.  
560 2012;35: 355–361. doi:10.1016/j.cimid.2012.02.005.
- 561 53. Norris MH, Blackburn JK. Linking geospatial and laboratory sciences to define  
562 mechanisms behind landscape level drivers of anthrax outbreaks. *Int J Environ Res*  
563 *Public Health*. 2019;16: 3747. doi:10.3390/ijerph16193747.
- 564 54. Otieno FT, Gachohi J, Gikuma-Njuru P, Kariuki P, Oyas H, Canfield SA, *et al.*  
565 Modeling the potential future distribution of anthrax outbreaks under multiple  
566 climate change scenarios for Kenya. *Int J Environ Res Public Health*. 2021;18: 4176.  
567 doi:10.3390/ijerph18084176.
- 568 55. Chen W-J, Lai S-J, Yang Y, Liu K, Li X-L, Yao H-W, *et al.* Mapping the distribution  
569 of anthrax in mainland China, 2005–2013. Vinetz JM, editor. *PLoS Negl Trop Dis*.  
570 2016;10: e0004637. doi:10.1371/journal.pntd.0004637.
- 571 56. Stella E, Mari L, Gabrieli J, Barbante C, Bertuzzo E. Mapping environmental  
572 suitability for anthrax reemergence in the Arctic. *Environ Res Lett*. 2021;16:  
573 105013. doi:10.1088/1748-9326/ac2527.
- 574 57. Johnson EE, Escobar LE, Zambrana-Torrel C. An ecological framework for  
575 modeling the geography of disease transmission. *Trends Ecol Evol*. 2019;34: 655–  
576 668. doi:10.1016/j.tree.2019.03.004.
- 577 58. Dreve V, Călin I, Bazgă B. Analysis on the evolution of Romanian sheep and goat  
578 sector after EU accession. *Sci Pap Ser Anim Sci*. 2016;59. Available from:  
579 <http://animalsciencejournal.usamv.ro/pdf/2016/Art36.pdf>
- 580 59. FAO. Smallholders and family farms in Georgia - country study report 2019.  
581 Budapest, Hungary: FAO; 2019. doi:10.4060/ca9822en.
- 582 60. Meeta Punjabi Mehta, FAO. Developing the sheep value chain in Azerbaijan - vision  
583 2025. FAO, Ministry of Agriculture in Azerbaijan; 2019. doi:10.4060/cb0288en.

- 584 61. Rukhkyan L. Country report on the state of the Armenian animal genetic resources.  
585 Yerevan, Republic of Armenia: Ministry of Agriculture; 2003. Available from:  
586 <https://www.fao.org/3/a1250e/annexes/CountryReports/Armenia.pdf>
- 587 62. General Directorate of Agricultural Research and Policies. Turkey country report on  
588 farm animal genetic resources. Ankara, Türkiye: FAO; 2004. p. 68. Available from:  
589 <https://www.fao.org/3/a1250e/annexes/CountryReports/Turkey.pdf>
- 590 63. Sen O, Ruban S, Getya A, Nesterov Y. 13. Current state and future outlook for  
591 development of the milk and beef sectors in Ukraine. In: Kuipers A, Keane G,  
592 Rozstalnyy A, editors. Cattle husbandry in Eastern Europe and China. Wageningen,  
593 The Netherlands: Wageningen Academic Publishers; 2014. pp. 169–180.  
594 doi:10.3920/978-90-8686-785-1\_13.
- 595 64. Tarassevych A. Ukraine - livestock and products annual, 2019 USDA foreign  
596 agricultural service report. Kyiv: Office of Agricultural Affairs; 2019. Available  
597 from:  
598 [https://apps.fas.usda.gov/newgainapi/api/report/downloadreportbyfilename?filena  
599 me=Livestock%20and%20Products%20Annual\\_Kiev\\_Ukraine\\_8-30-2019.pdf](https://apps.fas.usda.gov/newgainapi/api/report/downloadreportbyfilename?filename=Livestock%20and%20Products%20Annual_Kiev_Ukraine_8-30-2019.pdf)
- 600 65. Kuznetsova A. Prospects for the development of the dairy industry in the republic  
601 of Belarus and in the Russian Federation. Hradec Economic Days. Hradec Kralove,  
602 Czech Republic: University of Hradec Kralove; 2020. doi:10.36689/uhk/hed/2020-  
603 01-048.
- 604 66. Stankov K. Economic efficiency analysis of dairy cattle farms in Bulgaria. *Trakia J*  
605 *Sci.* 2015;13: 226–232. doi:10.15547/tjs.2015.s.01.038.
- 606 67. FAO. Smallholders and family farms in the Republic of Moldova - country study  
607 report 2019. Budapest, Hungary: FAO; 2020. doi:10.4060/ca9836en.
- 608 68. Arede M, Beltrán-Alcrudo D, Benfield C, Casal J, Njeumi F, Ciaravino G, *et al.*  
609 Risk mapping the peste des petits ruminants spread in the Black Sea basin: a spatial  
610 multicriteria decision analysis approach. [Preprint]. 2024 [cited 20 Feb 2024].  
611 Available from: [https://papers.ssrn.com/sol3/papers.cfm?abstract\\_id=4723954](https://papers.ssrn.com/sol3/papers.cfm?abstract_id=4723954).  
612 doi:10.2139/ssrn.4723954.
- 613 69. Strouhalová B, Ertlen D, Šefrna L, Novák TJ, Virágh K, Schwartz D. Assessing the  
614 vegetation history of european chernozems through qualitative near infrared  
615 spectroscopy. *Quat Rev Assoc Fr Pour Létude Quat.* 2019; 227–241.  
616 doi:10.4000/quatenaire.12101.
- 617 70. Dragon DC, Rennie RP. The ecology of anthrax spores: tough but not invincible.  
618 *Can Vet J Rev Veterinaire Can.* 1995;36: 295–301. PMID: 7773917; PMCID:  
619 PMC1686874.
- 620 71. World Bank Group. World bank climate change knowledge portal. 2023 [cited 2 Jan  
621 2024]. Available from: <https://climateknowledgeportal.worldbank.org/>



- 622 72. Blackburn JK, Matarimov S, Kozhokeeva S, Tagaeva Z, Bell LK, Kracalik IT, *et*  
623 *al.* Modeling the ecological niche of *Bacillus anthracis* to map anthrax risk in  
624 Kyrgyzstan. *Am J Trop Med Hyg.* 2017;96: 550–556. doi:10.4269/ajtmh.16-0758.
- 625 73. World Meteorological Organization. Animal health and production at extremes of  
626 weather: reports of the CAgM Working Groups on Weather and Animal Disease  
627 and Weather and Animal Health. Geneva: Secretariat of the World Meteorological  
628 Organization,; 1989. Available from:  
629 [https://digitallibrary.un.org/record/45480/files/wmo\\_685.pdf](https://digitallibrary.un.org/record/45480/files/wmo_685.pdf)
- 630 74. Gurbanov Sh, Akhmedova S. Especially dangerous infections in Azerbaijan. In:  
631 O’Connell KP, Skowronski EW, Sulakvelidze A, Bakanidze L, editors. *Emerging*  
632 *and Endemic Pathogens.* Dordrecht: Springer Netherlands; 2010. pp. 39–43.  
633 doi:10.1007/978-90-481-9637-1\_5.
- 634 75. Özkurt Z, Parlak M, Tastan R, Dinler U, Saglam YS, Ozyurek SF. Anthrax in eastern  
635 Turkey, 1992-2004. *Emerg Infect Dis.* 2005;11: 1939–1941.  
636 doi:10.3201/eid1112.050779.
- 637 76. Kangbai J, Momoh E. Anthropogenic climatic change risks a global anthrax  
638 outbreak: a short communication. *J Trop Dis.* 2017;5:4. doi: 10.4172/2329-  
639 891X.1000244.
- 640 77. Rao S, Traxler R, Napetavaridze T, Asanishvili Z, Rukhadze K, Maghlakelidze G,  
641 *et al.* Risk factors associated with the occurrence of anthrax outbreaks in livestock  
642 in the country of Georgia: a case-control investigation 2013-2015. Raboisson D,  
643 editor. *PLoS ONE.* 2019;14: e0215228. doi:10.1371/journal.pone.0215228.

644

645

## 646 **Supporting Information Captions**

647 **S1 File. Anthrax occurrences data sources, environmental domains, and R packages**  
648 **used in the current study. (PDF)**

649 **S2 Fig. Seasonal trend of *Bacillus anthracis* georeferenced occurrences during our**  
650 **study period. (TIFF)**

651 **S2 File. Description of model outputs for non-selected models and Maxent output**  
652 **for selected approach. (PDF)**



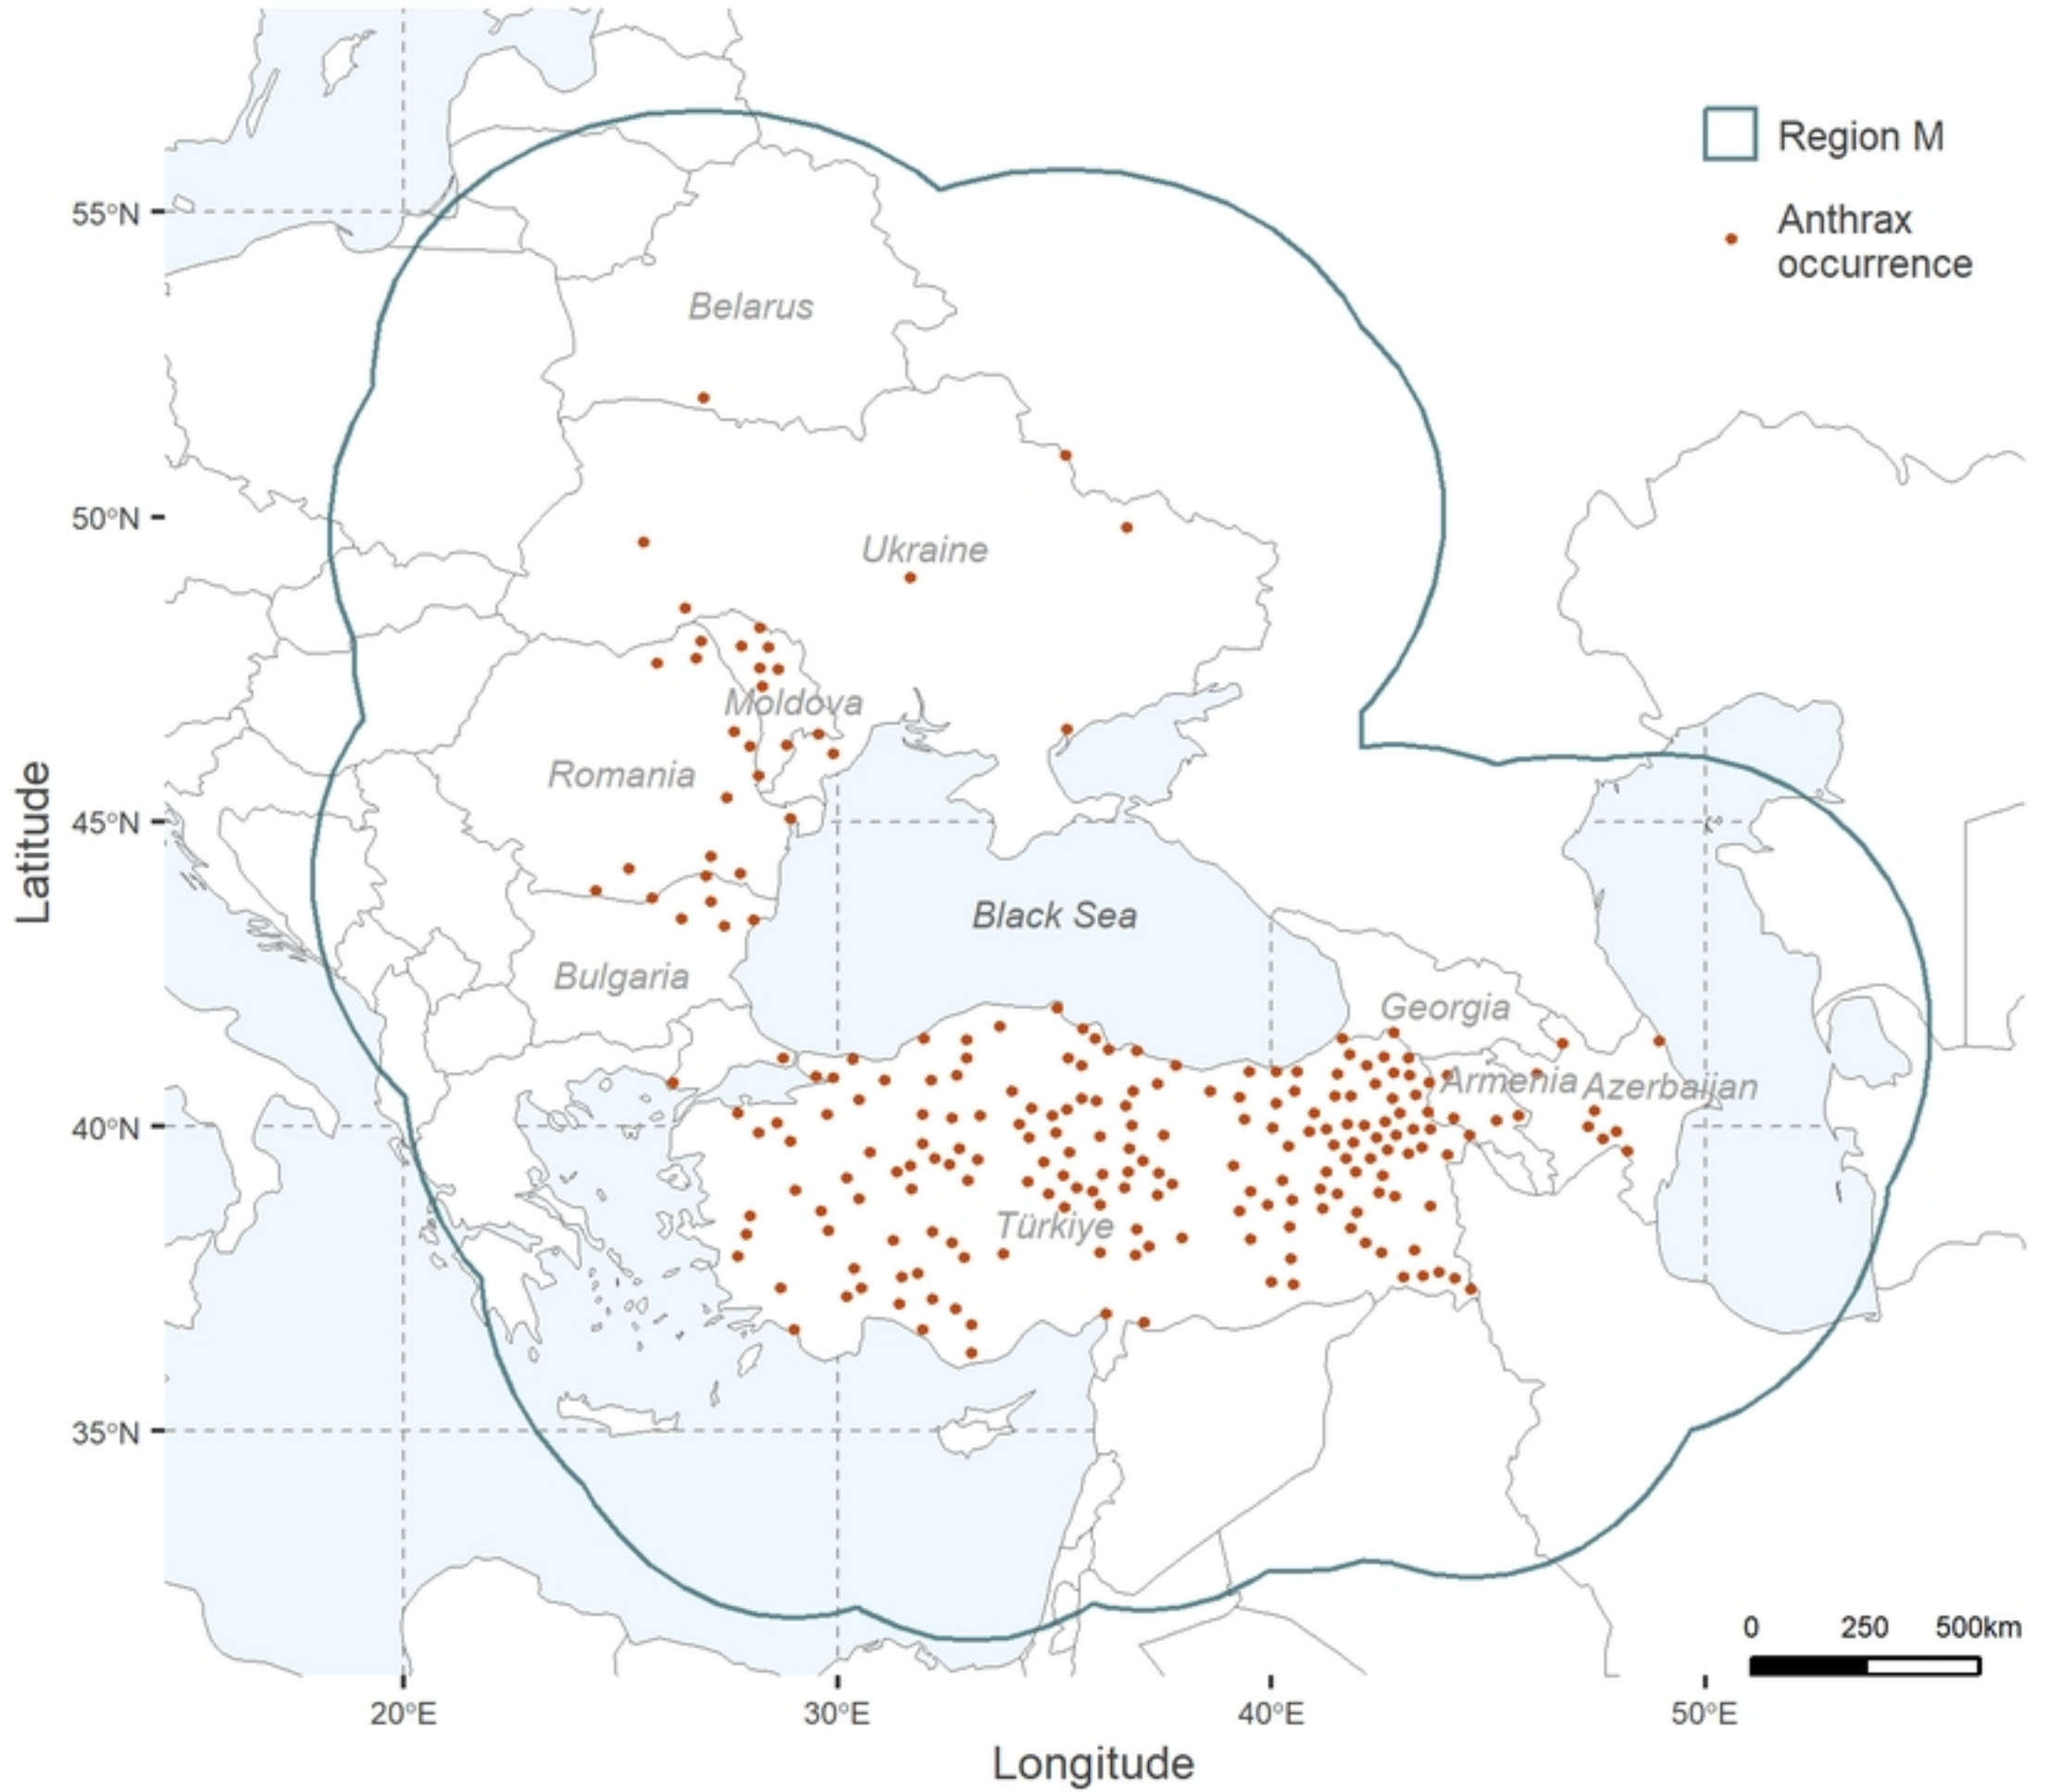

Fig 1

# Approach 3

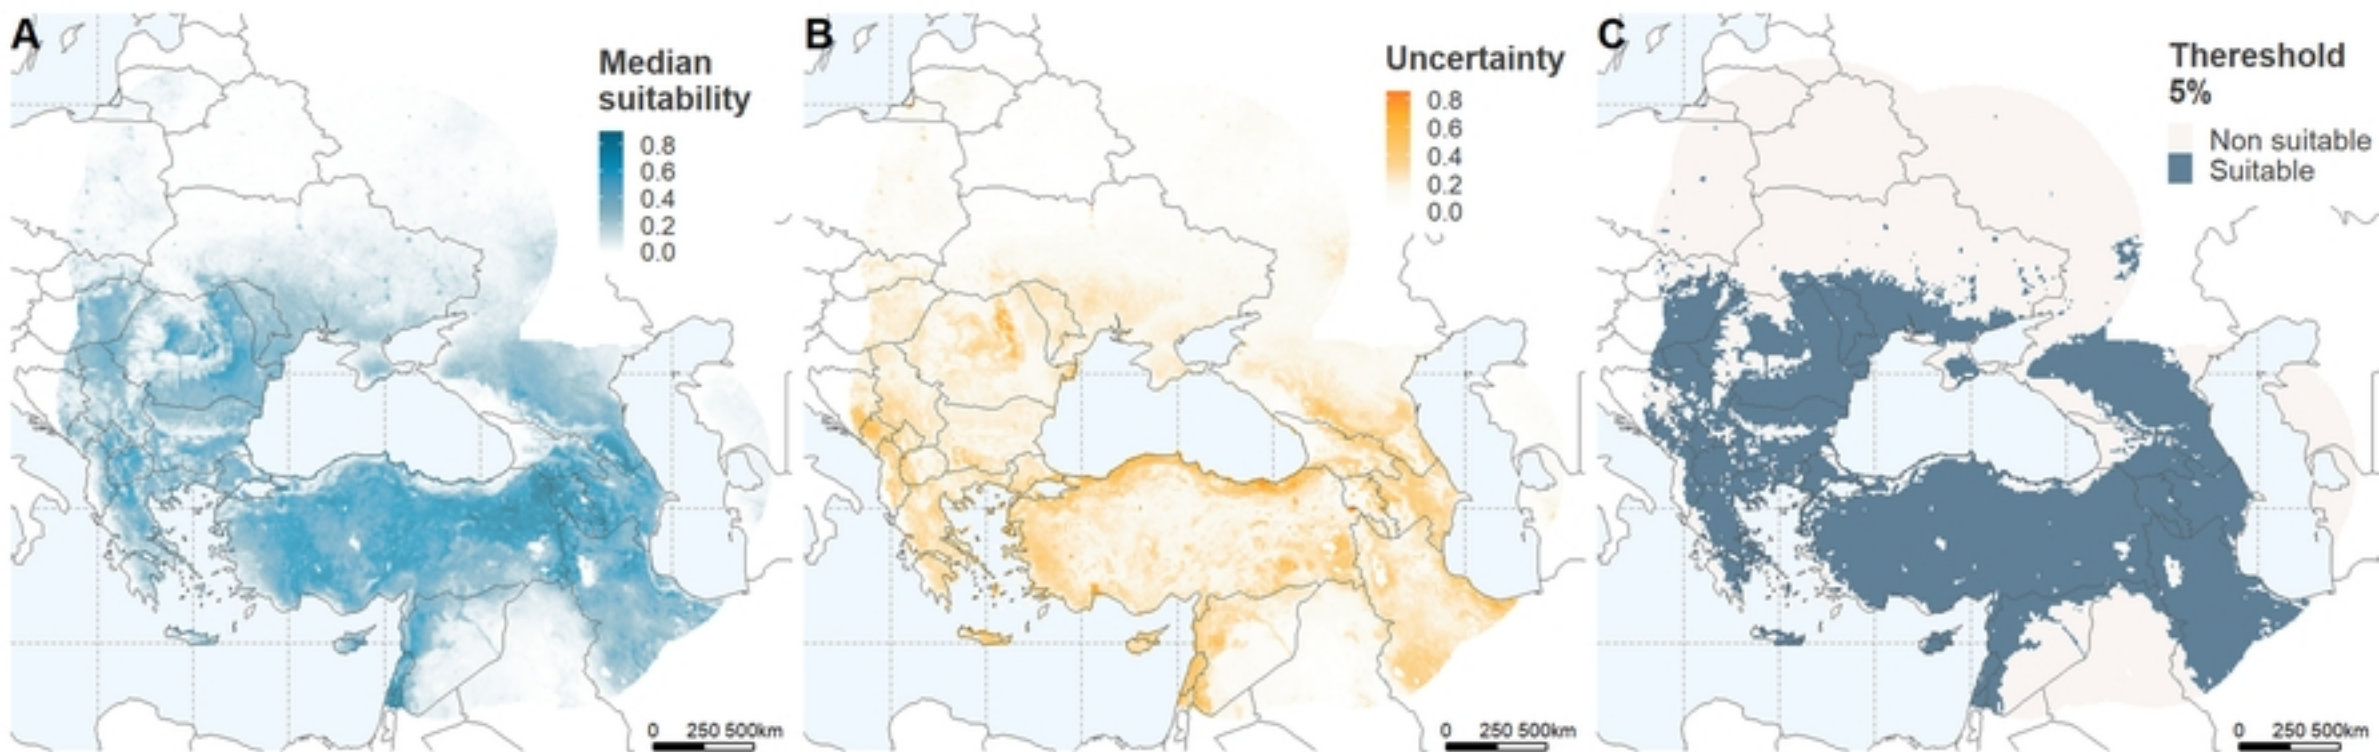

Fig 2

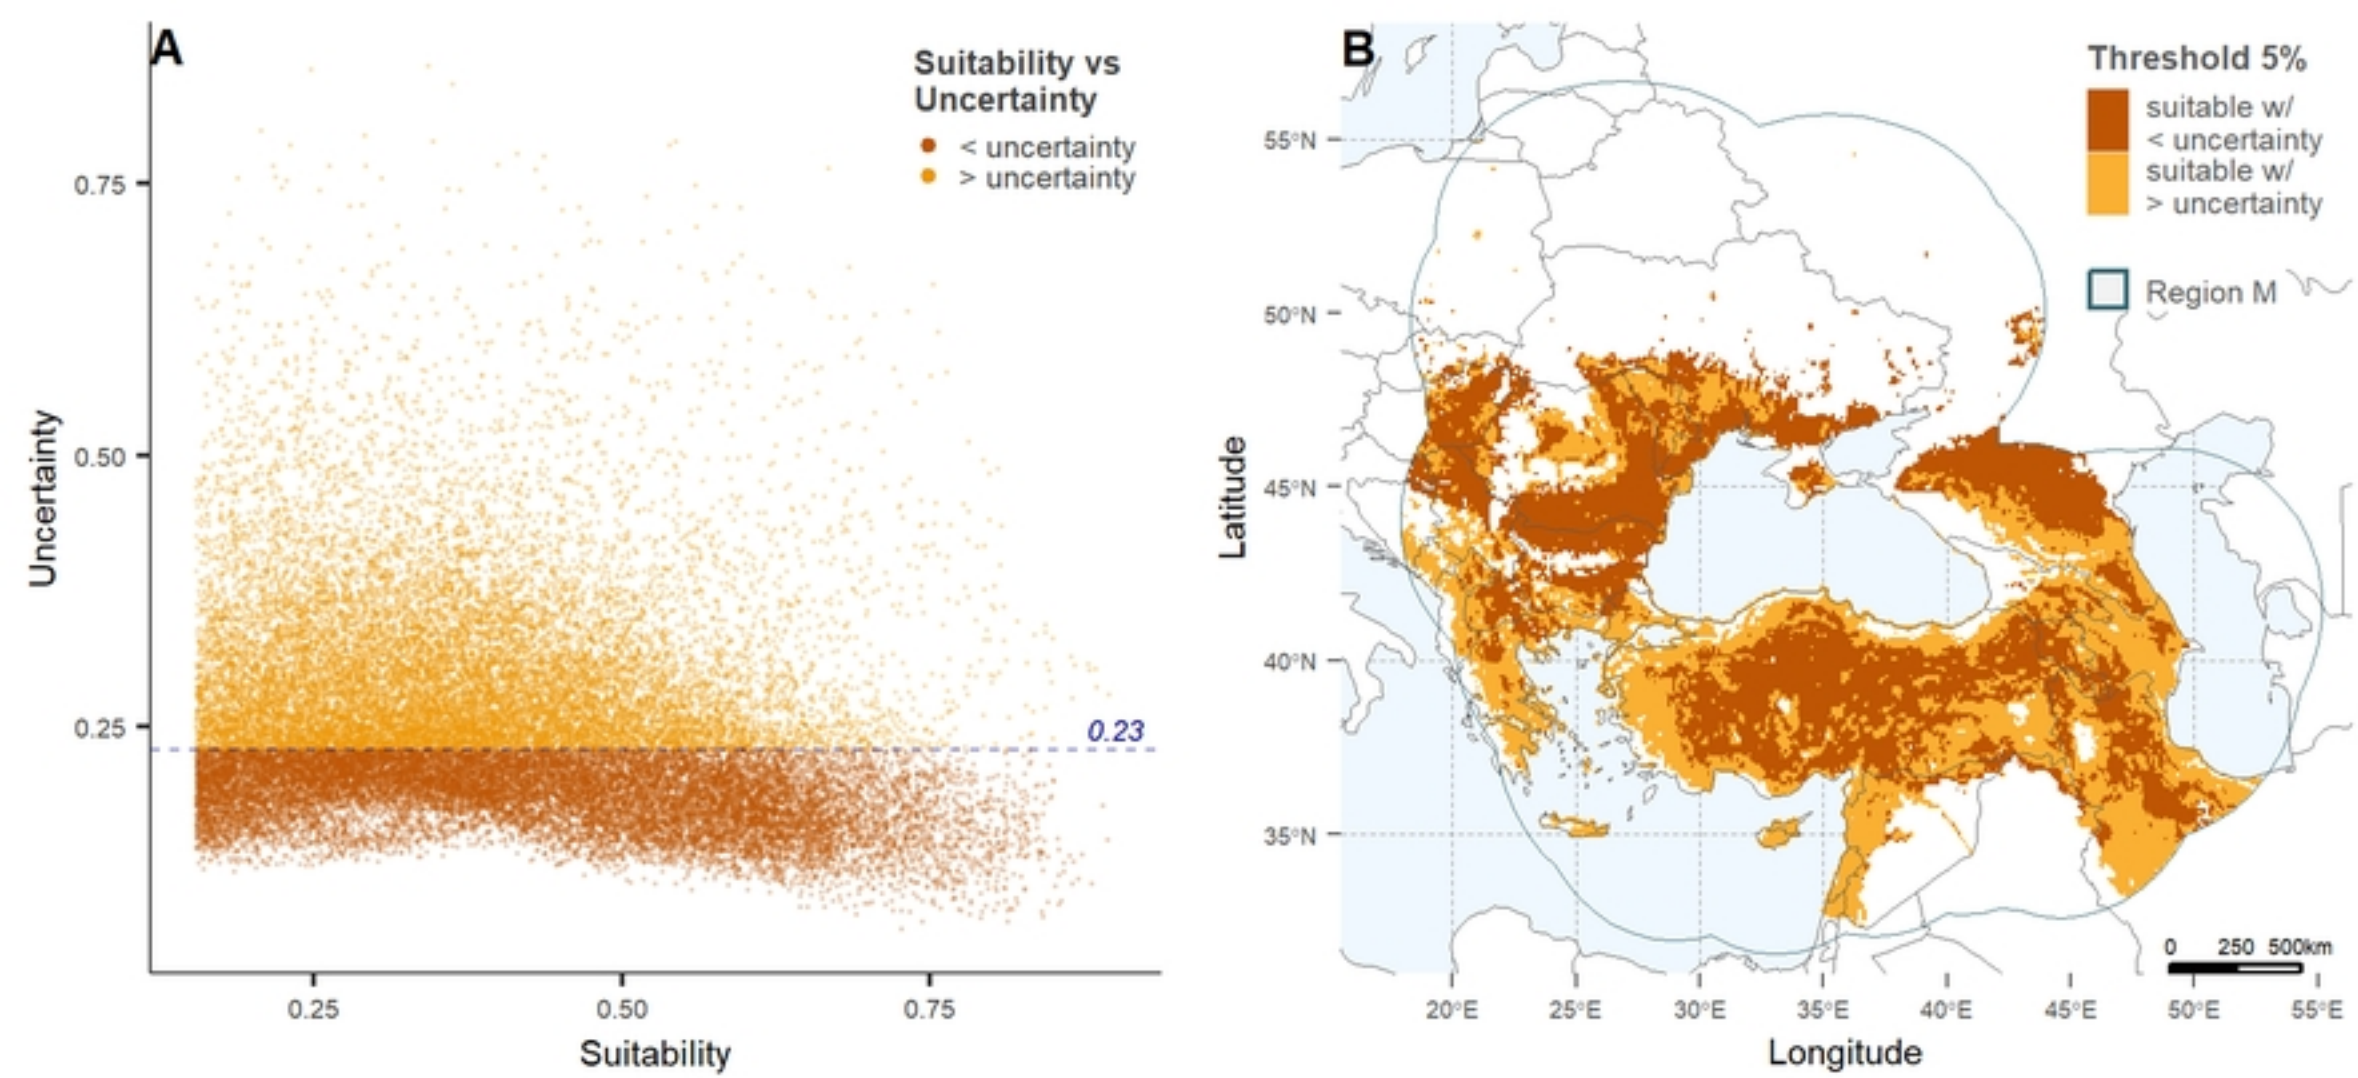

Fig 3
